1 **Parenteral glucose supply and pharmacological glycolysis inhibition**

2 **determine the clinical fate of infected preterm newborns**

3 Tik Muk<sup>1#</sup>, Anders Brunse<sup>1#</sup>, Nicole L. Henriksen<sup>1</sup>, Karoline Aasmul-Olsen<sup>1</sup>, Duc Ninh Nguyen<sup>1\*</sup>

4 *<sup>1</sup>Section for Comparative Pediatrics and Nutrition, Department of Veterinary and Animal Sciences,*

5 *University of Copenhagen, Denmark*

6

7 # Co-first authors

8 \* Corresponding author: Duc Ninh Nguyen, Section of Comparative Pediatrics and Nutrition,

9 Department of Veterinary and Animal Sciences, University of Copenhagen, Dyrølægevej 68, DK-

10 1870 Frederiksberg C, Denmark. Tel: +45. 35333250. Email: [dmn@sund.ku.dk](mailto:dmn@sund.ku.dk)

11 Conflict-of-interest statement: The authors have declared that no conflict of interest exists.

12 **Abstract**

13 Preterm infants are susceptible to bloodstream infection that can lead to sepsis. High parenteral  
14 glucose supplement is commonly used to support their growth and energy expenditure, but may  
15 exceed endogenous regulation during infection, causing dysregulated immune response and clinical  
16 deterioration. Using a preterm piglet model of neonatal sepsis induced by *Staphylococcus*  
17 *epidermidis* infection, we demonstrate the delicate interplay between immunity and energy  
18 metabolism to regulate the host infection response. Circulating glucose levels, glycolysis and  
19 inflammatory response to infection are closely connected across the states of tolerance, resistance  
20 and immunoparalysis. Further, high parenteral glucose provision during infection induces  
21 hyperglycemia, elevated glycolysis and inflammation, leading to lactate acidosis and sepsis,  
22 whereas glucose restricted individuals are clinically unaffected with increased gluconeogenesis to  
23 maintain moderate hypoglycemia. Finally, pharmacological glycolysis inhibition during  
24 normoglycemia enhances bacterial clearance and dampens inflammation but fails to prevent sepsis.  
25 Our results uncover how blood glucose controls immune cell metabolism and function, in turn  
26 determining the clinical fate of infected preterm neonates. This also questions the current practice of  
27 parenteral glucose supply for infected preterm infants.

28 **Key words:** glycolysis, neonatal infection, neonatal sepsis, parenteral nutrition, preterm newborns

## 29 **Introduction**

30 Millions of infants are born preterm (< 37 weeks of gestation) every year with up to 40% of  
31 them experiencing serious neonatal infection, leading to sepsis (1). Coagulase-negative  
32 Staphylococci (CONS) are responsible for up to 75% of nosocomial late-onset sepsis (LOS, > 3  
33 days after birth) episodes with *S. epidermidis* being the predominant pathogenic species (2–4).  
34 Currently, there are no other effective therapies for neonatal infection than antibiotics, which are  
35 empirically used for almost all preterm infants despite only a small fraction of them indeed being  
36 infected (5, 6). Excessive antibiotic use predisposes to immunosuppression, secondary infection and  
37 antimicrobial resistance (7). Therefore, development of new infection therapies is of utmost  
38 importance.

39 Immunometabolism, the interplay between immune cell energy metabolism and function, has  
40 emerged as a key mechanism involved in many adult diseases, but its role in neonatal infection is  
41 unclear. Initial theoretical (8, 9) and *in vitro* reports (10, 11) suggest that the low energy reservoir in  
42 newborns programs the immune system to a disease tolerance strategy to avoid the Warburg effect  
43 in immune cells switching from oxidative phosphorylation (OXPHOS) to glycolysis, which quickly  
44 produces vast ATP amounts fueling inflammatory responses. This may explain how newborns,  
45 especially preterm newborns, can tolerate 10-100 times higher systemic bacterial loads (8) and have  
46 diminished blood cytokine responses to *in vitro* infection challenge (12, 13), relative to adults.  
47 However, it is still unclear how this disease tolerance of preterm infants is connected to their high  
48 susceptibility to neonatal sepsis, a pathological state characterized by an early hyper-inflammatory  
49 phase followed by immunoparalysis or death (14).

50 During the first few weeks of life, a majority of preterm infants receive parenteral nutrition  
51 (PN) to maintain sufficient nutrition, and international guidelines recommend high parenteral  
52 glucose supply (up to 17 g/kg/day) to avoid hypoglycemia (blood glucose <2.6 mM) and related  
53 brain injury (15–18). However, prolonged high parenteral glucose intake may lead to

54 hyperglycemia (blood glucose >6.9 mM)(19), which is detected in up to 80% preterm infants (20).  
55 Notably, there are no specific guidelines for using parenteral glucose during neonatal infection,  
56 although PN-related hyperglycemia is associated with longer hospitalization in septic infants (16).  
57 We postulate that high parenteral glucose provision to infected newborns may accelerate blood  
58 immune cell glycolysis, driving excessive inflammation and leading to sepsis. Detailed  
59 understanding of this mechanism may shed light on novel therapies, e.g. reduced parenteral glucose  
60 supply or glycolysis inhibition.

61 Numerous animal infection and sepsis models have been established, e.g. cecal ligation and  
62 puncture (21), oral (22, 23) or systemic bacterial challenge (24). However, no rodent models can  
63 address the contributing effects of PN. The preterm pig is a unique model because it allows PN  
64 administration via umbilical catheter, similar to preterm infants (25). Further, preterm pigs mimic  
65 the immaturities of multiple organs and infection susceptibility in preterm infants (24, 26–28).  
66 Systemic *S. epidermidis* administration to newborn preterm pigs can induce clinical and cellular  
67 responses (fever, inflammation, immune cell depletion) progressing to septic shock (acidemia, and  
68 hypotension) 12-24h post-infection (24). Here, we further utilized this sepsis model and showed  
69 that the immunometabolic response to infection in preterm newborns was tightly regulated by  
70 circulating glycolysis-OXPHOS axis and glucose levels. We found that high parenteral glucose  
71 supply predisposed to hyperglycemia, excessive inflammation, reduced bacterial clearance and  
72 extreme sensitivity to sepsis following neonatal infection, while restricted parenteral glucose  
73 provision protected against sepsis. We also showed that a lesser reduction in glucose supply, with or  
74 without administration of a glycolysis inhibitor dichloroacetate (DCA), prevented hypoglycemia,  
75 enhanced bacterial clearance, alleviated systemic inflammation and lactic acidosis but did not  
76 protect against sepsis. Parenteral glucose restriction may be an effective and lifesaving therapy for  
77 infected preterm infants.

## 78 **Results**

### 79 ***In vitro* and *in vivo* *S. epidermidis* thresholds determine the host immunometabolic responses**

80 Preterm infants can presumably withstand higher circulating bacterial levels than adults and  
81 term infants prior to mounting resistant responses and later immunoparalysis (8). Here we first  
82 tested the threshold switching among those phases by measuring *in vitro* immunometabolic  
83 responses of cord blood from preterm pigs to increasing doses of *S. epidermidis* (Fig. 1A-F). At low  
84 bacterial doses ( $5 \times 10^1$ -  $5 \times 10^4$  CFU/ml), inflammatory (TNF $\alpha$ ) and anti-inflammatory (IL10)  
85 cytokine responses at both gene and protein levels were trivial, indicating an immune tolerant state  
86 (green, Fig.1 A-C, and Fig. S1A-C). At a dose of  $5 \times 10^5$  CFU/ml, a switch to resistant response  
87 occurred with an increase in TNF $\alpha$  and IL10 at both protein and gene levels (orange), relative to  
88 control and lower bacterial doses. Of note, the ratio of *TNFA/IL10* (Th1/Th2 cytokines) peaked at  
89 the dose of  $5 \times 10^5$  CFU/ml, but decreased again at higher doses, indicating another switch from  
90 resistant response to immunoparalysis (red). The same trends applied to other parameters, including  
91 elevated inflammatory targets (*IL6*, *TLR2*) and Th1 responses (*IFNG* and *IFNG/IL4*), and decreased  
92 regulatory T cell percentage at the bacterial dose of  $5 \times 10^5$  CFU/ml but not lower or higher doses  
93 (Fig. 1F and Fig. S1D-H). In parallel, cellular glucose uptake, measured by the differences in  
94 supernatant glucose levels with vs. without bacterial challenge, was gradually elevated with  
95 increasing bacterial doses, then reached a plateau level at the bacterial dose of  $5 \times 10^5$  CFU/ml (Fig.  
96 S1I). Further, genes related to OXPHOS (*COX1*) and glycolysis-mTOR pathway (*HIF1A*) were  
97 lowest and highest, respectively, also at the bacterial dose causing resistant responses (orange, Fig.  
98 1D-E). These data revealed a clear dose-dependent switch of immunometabolic response to *S.*  
99 *epidermidis* from tolerance (low doses) to resistance (higher doses) and later immunoparalysis (very  
100 high doses).

101 We then tested clinical and metabolic responses to increasing *S. epidermidis* doses *in vivo*,  
102 using newborn preterm pigs (90% gestation) nourished by PN with a standard glucose level. The  
103 animals were clinically and metabolically unaffected by the two lowest doses ( $10^6$ - $10^8$  CFU/kg,  
104 disease tolerance). At a dose of  $10^9$  CFU/kg, survival was 75% with dysregulated glucose and  
105 lactate at 24 h follow-up (disease resistance), whereas the highest dose of  $5 \times 10^9$  CFU/kg decreased  
106 24 h survival to less than 20% and induced glucose and lactate dysregulation already at 12 h (Fig.  
107 1G-I). Thus, clinical responses were clearly intertwined with perturbed glucose homeostasis and  
108 followed a severity spectrum dictated by *S. epidermidis* dose. Both *in vitro* and *in vivo* studies  
109 showed that immune cells had a propensity to undergo a metabolic shift towards aerobic glycolysis  
110 when activated, whereby glucose availability determined the potency of the cellular response with  
111 potential clinical implications.

#### 112 **PN glucose determines sepsis susceptibility during *S. epidermidis* infection**

113 We next investigated clinical, metabolic and immune responses to bacteremia on the background of  
114 extreme differences in glucose provision. Preterm neonatal piglets were nourished exclusively with  
115 PN containing either a very high (HG, 30 g/kg/day) or a very low glucose (LG, 2 g/kg/day) level,  
116 and systemically challenged with  $10^9$  CFU/kg *S. epidermidis*, the dose leading to clinical symptoms  
117 but moderate acute mortality (experimental design in Fig. 2A). Although no animals were  
118 euthanized preschedule, those provided high amounts of glucose (HG) showed signs of septic shock  
119 at 12 h including lethargy, discoloration and tachypnea. Moreover, HG piglets had a quicker  
120 passage of meconium compared with animals provided low-glucose (LG), a common physiological  
121 stress response in the perinatal period (Fig. 2B). In addition, plasma albumin levels were two times  
122 lower in HG relative to LG ( $P < 0.01$ ) to indicate stress-induced changes in liver protein synthesis,  
123 vascular permeability or renal dysfunction. This was accompanied by impaired blood bacterial  
124 clearance dynamics from 3-12 h in the HG group (Fig. 2C). The effects of *S. epidermidis* infection  
125 on blood gases and acidity over time were characterized by decreased pH and acid buffering

126 capacity as well as increased pCO<sub>2</sub>. Importantly, LG reduced blood acidification and respiratory  
127 acidosis, relative to HG, and preserved blood acid buffering capacity (Fig. 2D-F). Taken together,  
128 restricted glucose supply during neonatal bacterial infection provided acute clinical benefits.

129         Unsurprisingly, HG piglets were hyperglycemic (blood glucose of 10-20 mM) with an  
130 increasing trend over time, whereas the LG nourishment paradigm led to hypoglycemia with blood  
131 glucose levels around 2 mM and a decreasing time trend (Fig. 2G). We observed a similar pattern  
132 for blood lactate (Fig. 2H), where 40% of animals in the HG group had levels above 10 mM,  
133 indicating accelerated circulating glycolysis and lactic acidosis, while lactate levels in the LG group  
134 decreased over time as it was likely utilized for gluconeogenesis. Despite a large difference in  
135 plasma glucose, adenosine triphosphate (ATP) and pyruvate levels only showed minor or no  
136 differences between HG and LG groups (Fig. 2I-J). However, blood urea levels were markedly  
137 increased in LG relative to HG animals (Fig. 2K), suggesting conversion of exogenous glucogenic  
138 amino acids to fuel endogenous glucose production. On the other hand, the plasma activity of  
139 alanine aminotransferase, the enzyme responsible for deaminating alanine to pyruvate as an initial  
140 step in gluconeogenesis, was decreased in the LG group (Fig. 2L). In summary, high parenteral  
141 glucose provision facilitated extensive circulating glycolysis whereas acute metabolic adaptation to  
142 exogenous glucose restriction during infection appeared to maintain adequate cellular energy.

143         During the 12 h course of infection, glucose infusion levels massively interfered with the fate  
144 of blood cell subsets. An overall decreasing trend in cell numbers was observed over time for  
145 leukocytes, erythrocytes and thrombocytes (Fig. 3A-C), where HG led to a greater loss of total  
146 leukocytes and more severe thrombocytopenia. Importantly, HG induced a robust depletion of  
147 lymphocytes and neutrophils at 6 h with partial replenishment at 12 h, which was not observed in  
148 the LG group (Fig. 3D-E). Monocyte cell numbers tended to be lower at 3 h and replenished at 12h  
149 only in the HG group (Fig. 3F). Interestingly, this was associated with distinct temporal changes in  
150 the cytokine response to infection. While TNF $\alpha$ , IL10 and IL6 all increased during the course of the

151 infection (Fig. 3G-I), the TNF $\alpha$  and IL6 responses were more pronounced in HG, and conversely  
152 IL10 levels increased more over time in the LG group. Collectively, the HG nourishment paradigm  
153 induced a more rapid immune response with greater cell loss and evidence of emergency  
154 hematopoiesis, prioritizing release of leukocytes but not erythrocytes and thrombocytes from the  
155 bone marrow. This may have compromised the regulatory immune response characterized by  
156 reduced IL10 secretion.

157 Although glucose restriction has acute clinical benefits with reduced glycolysis, systemic  
158 inflammation and clinical signs of sepsis, this practice led to hypoglycemia and may have negative  
159 effects on the preterm brain, relying on steady supplies of glucose for proper development. As such,  
160 alternative strategies to manipulate the immune-metabolic response to infection in a normo- or  
161 hyper-glycemic state should be investigated.

#### 162 **Glycolysis inhibition decreases inflammatory response to *S. epidermidis* in vitro**

163 Having shown that immune cell metabolism, especially glycolysis, is closely connected to  
164 inflammation and clinical fate during neonatal bacterial infection, we aimed to identify a clinically  
165 relevant treatment to prevent sepsis and exaggerated aerobic glycolysis beyond glucose restriction.  
166 First, we tested the well-known glycolysis inhibitors rapamycin (10 nM, targets mTOR pathway),  
167 dichoroacetate (DCA, at 10 mM, targets pyruvate dehydrogenase kinase) and FX11 (100  $\mu$ M,  
168 targets lactate dehydrogenase) for their capacity to reduce inflammatory responses in preterm pig  
169 cord blood challenged with *S. epidermidis*. TNF $\alpha$  response was lower when each of the inhibitors  
170 was added to cord blood, but DCA seemed to have higher inhibitory potency across the two  
171 bacterial doses challenged (Fig. 4A). We proceeded with a dose-finding test for DCA, a short half-  
172 life and water-soluble small molecule, widely used for cancer and diabetic patients (29) to suppress  
173 inflammation with limited adverse effects (30). At a dose of 10 mM, DCA decreased *S.*  
174 *epidermidis*-induced TNF $\alpha$  secretion more effectively than lower doses (Fig. 4B). DCA at 10 mM



175 but not lower doses tended to be more efficient in decreasing expressions of hexokinase 2 (*HK2*,  
176 enzyme facilitating first reaction of glycolysis pathway) and *CXCL8* (pro-inflammatory  
177 chemokine), and increasing expression of *IL10* (anti-inflammatory cytokine, Fig. S2A-C). Of note,  
178 preterm cord blood incubated with DCA had increased neutrophil phagocytic capacity under both  
179 normo- and hyper-glycemic conditions (Fig. 4C). We further performed RNA-seq analysis of *S.*  
180 *epidermidis* stimulated cord blood with or without DCA addition (Fig. 4D-H, Tables S1-8 and Fig.  
181 S3) and observed clear patterns of differently expressed genes in control vs. *S. epidermidis*-  
182 stimulated samples (90 DEGs) as well as stimulated samples without vs. with DCA (239 DEGs). *S.*  
183 *epidermidis* stimulation up-regulated genes and pathways related to inflammation, innate and  
184 adaptive immune activation and down-regulated genes involved in OXPHOS (Fig. 4E-F).  
185 Conversely, comparing the two bacteria-stimulated groups, DCA treatment up-regulated anti-  
186 inflammatory pathways, pathways related to OXPHOS and mitochondrial ATP synthesis, and  
187 down-regulated pathways related to inflammatory responses (Fig. 4E-G). DCA treatment also  
188 increased genes related to endocytosis and phagocytosis (Fig. 4H). Collectively, DCA appeared  
189 capable of inhibiting infection-induced immune cell glycolysis and inflammation, and was therefore  
190 selected as our drug candidate for preventing neonatal sepsis under normo- and hyper-glycemic  
191 conditions.

192 **DCA reduces inflammation and improves bacterial clearance during normoglycemia but does**  
193 **not prevent sepsis**

194 Having identified glycolysis inhibition by DCA as a potential alternative to glucose restriction, we  
195 again utilized the preterm pig *S. epidermidis* infection model to test the ability of DCA to modulate  
196 clinical and molecular outcomes during neonatal infection. The animals were provided with  
197 standard (STG, considered current clinical practice, 14.4 g/kg/day) or high parenteral glucose levels  
198 (HG, 30 g/kg/day), as well as DCA treatment (50 mg/kg, approximately 10 nM in the circulation,  
199 similar to *in vitro* data) or saline control shortly after *S. epidermidis* infusion (experimental design

200 in Fig. 5A). We hypothesized that standard glucose provision as well as DCA treatment would  
201 protect against sepsis in the absence of hypoglycemia.

202 The meconium passage time was generally more rapid in this experiment including uninfected  
203 controls. Nevertheless, delayed meconium passage was observed in the STG group compared with  
204 HG ( $P < 0.05$ , Fig. 5B) in line with the previous *in vivo* experiment. However, this difference was not  
205 present in DCA treated animals. Importantly, bacterial clearance 3-12h post-infection was enhanced  
206 in STG groups, relative to HG, while DCA improved bacterial clearance only under STG conditions  
207 (Fig. 5C). However, the sepsis indicators blood pH and  $pCO_2$  were similar across the four infected  
208 groups even though there were indications of better blood acid-base balance in STG-DCA pigs  
209 across 3-12 h post-infection (Fig. 5D-F). Unsurprisingly, most of the animals in the two infected  
210 groups provided high PN glucose were hyperglycemic and most of those in the two infected groups  
211 provided the lower standardized PN glucose were normoglycemic. Further, we detected an  
212 interesting trend of decreased glucose over time in HG pigs but not in HG-DCA pigs (significantly  
213 higher at 6h in HG-DCA pigs, Fig. 5G). This suggested that the HG pigs utilized blood glucose for  
214 glycolysis during infection whereas glycolysis inhibition resulted in the consistent hyperglycemic  
215 conditions in HG-DCA pigs. Blood lactate was reduced effectively by either lowering PN glucose  
216 supply or DCA treatment, reflecting the pyruvate dehydrogenase kinase inhibitory mechanism of  
217 action of DCA, with an indication of lowest levels in STG-DCA pigs (Fig. 5H). In parallel, plasma  
218 pyruvate and ATP levels, reflecting the degree of energy production enhanced by glycolysis during  
219 infection, were reduced in the STG groups, particularly in combination with DCA treatment (Fig.  
220 5I-J). This corroborated the previously presented *in vitro* data.

221 Reduced PN glucose and DCA interventions also exerted differential effects on blood  
222 immune cell subsets and cytokines. In accordance with the previous experiment, infection caused  
223 significant reductions of all subsets of immune cells, erythrocytes, reticulocytes and thrombocytes  
224 (Fig. 6 A-G). Lowering PN glucose from high to standard levels preserved fractions of neutrophils,

225 lymphocytes, thrombocytes and reticulocytes (Fig. 6 C-E,G). Only STG-DCA treatment showed  
226 highest levels of lymphocytes over time, suggesting that DCA only exerts a beneficial effect under  
227 normoglycemia. Conversely, the HG-DCA animals had the most severe drops of erythrocytes,  
228 thrombocytes and lymphocytes, possibly suggesting the negative impact of more severe  
229 hyperglycemic conditions, relative to the HG animals. In line with hematological parameters,  
230 plasma levels of IL6, but not IL10, in HG-DCA animals were highest, relative to the remaining  
231 three groups (Fig. 6 H-I).

232 To better understand the effects of standard glucose supply and DCA at molecular levels, a  
233 subset of blood samples at 12 h post-infection were used for whole-transcriptome analyses (Fig. 7  
234 and Tables S9-17). *S. epidermidis* infection induced dramatic blood transcriptome changes (21.2%  
235 of annotated genes), with 1967 down- and 2011 up-regulated DEGs, leading to elevated pathways  
236 related to innate immunity (TLR, NOD signaling) and early phase of Th1 polarization (chemokine  
237 and TNF signaling) and down-regulated adaptive immune pathways (T and B cell receptor  
238 signaling, Fig.7A-B, Table S15-17). Multiple metabolism-related genes/pathways were also down-  
239 regulated by infection, including fatty acid degradation (Fig.7B). Comparisons among the four  
240 infected groups (Table S9-14) showed that HG pigs possessed a distinct profile of inflammation-  
241 related genes with half of the DEGs being highly up-regulated and the other half being down-  
242 regulated, relative to the remaining three groups (Fig. 7C). Surprisingly, HG-DCA pigs with the  
243 worst clinical outcomes possessed a similar blood transcriptome profile to STG and STG-DCA  
244 pigs. HG pigs had increased levels of multiple genes related to energy metabolism and ATP  
245 synthesis, when compared to STG (Fig. 7D) or HG-DCA pigs (Fig. 7E). These data suggest that  
246 high circulating glucose levels accelerated metabolic pathways to synthesize ATP fueling excessive  
247 inflammatory responses to infection. Conversely, reducing PN glucose intake from high to standard  
248 levels or using DCA treatment conveyed similar changes at transcription level to the direction of  
249 less inflammation and energy metabolism. These in combination with other data imply that the

250 detrimental impact of DCA during high PN glucose supply on clinical outcomes were likely derived  
251 from the more severe hyperglycemia induced by the inhibitory effects of DCA on blood cellular  
252 glucose uptake.

253         In summary, whereas standard relative to high glucose provision reduced the acute stress  
254 response to *S. epidermidis* infection and improved bacterial clearance from the blood, it failed to  
255 provide the same protection against sepsis as bona fide glucose restriction. Moreover, DCA  
256 treatment appeared to offer further benefits in infected animals on standard glucose provision, while  
257 it exacerbated the hyperglycemic condition and inflammation during high glucose provision.

## 258 **Discussion**

259           A delicate balance of metabolic and immune responses determines how neonates manage to  
260 survive serious infections (8). Here, we identified bacterial dose-dependent immunometabolic  
261 thresholds *in vitro* and *in vivo*, and uncovered the modulatory roles of systemic glucose provision  
262 and cellular energy metabolism in regulating inflammation and sepsis outcomes in a clinically-  
263 relevant animal model of neonatal bloodstream infection. First, the metabolic responses of cord  
264 blood and preterm experimental animals to *S. epidermidis* were dose-dependent, whereby glycolysis  
265 and OXPHOS markers increased and decreased, respectively, with increasing bacterial dose only  
266 until a certain dose, after which they were normalized to levels in controls. This is a demonstration  
267 of the Warburg effect taking place in activated immune cells (31) and defines the immunometabolic  
268 thresholds from immune tolerance to activation and later immunoparalysis coupled with perturbed  
269 glucose homeostasis. Second, a proof-of-concept study showed that high parenteral glucose  
270 provision in infected individuals was clearly detrimental, via induced hyperglycemia, accelerated  
271 glycolysis producing lactate and ATP, fueling inflammatory responses and leading to sepsis. In  
272 contrast, parenteral glucose restriction caused hypoglycemia but reduced inflammation and  
273 protected against sepsis. Third, cord blood stimulated with *S. epidermidis* and glycolysis inhibitors  
274 showed clear effects of glycolytic inhibition to reduce inflammation, and to enhance OXPHOS and  
275 neutrophil phagocytosis. Finally, we found that effects of glycolysis inhibition by the pyruvate  
276 dehydrogenase kinase inhibitor DCA in infected individuals depended on the level of glucose  
277 provision. DCA increased inflammation and prompted more severe hyperglycemia during high  
278 glucose provision, whereas it decreased inflammation and improved bacterial clearance during  
279 standard glucose provision, albeit without preventing sepsis. The mechanistic insights from the  
280 current study suggest that parenteral glucose restriction could be a lifesaving therapy for infected  
281 preterm infants despite causing temporary hypoglycemia.

282           Increasing bacterial dose *in vitro* and *in vivo* led to the switch from tolerant to resistant  
283 responses (increased cellular glucose uptake producing lactate, decreased OXPHOS-related genes  
284 and Treg levels), and finally to immunoparalysis or death. The tolerant status in the current study is  
285 similar to the impaired immunometabolic responses to LPS or bacteria of preterm vs. term  
286 monocytes (10, 32), or that of preterm infants with vs. without sepsis (4). Increased bacterial dose  
287 beyond the resistance threshold decreased the ratio of pro- vs. anti-inflammatory genes, normalized  
288 Treg levels and OXPHOS-related genes to that in controls (immunoparalysis), which likely  
289 occurred when blood cells used up all their energy stores. This is similar to the immunosuppression  
290 in late stages of sepsis in infants and elderly (14, 33), which predisposes to secondary infections. To  
291 further test effects of glucose provision and pharmacological glycolysis inhibition, we selected the  
292 *S. epidermidis* dose exerting resistant responses and sepsis signs without significant acute mortality.  
293 Relative to infected animals with restricted parenteral glucose, those with high parenteral glucose  
294 supply had hyperglycemia, thrombocytopenia, leukopenia, lower blood pH, impaired bacterial  
295 clearance, and higher levels of blood lactate, pCO<sub>2</sub>, ATP, and inflammatory cytokines.  
296 Hyperglycemia in infected adult animals is known to impair monocyte chemotaxis and neutrophil  
297 phagocytosis, thereby decreasing systemic bacterial clearance and increasing sepsis risk (34, 35).  
298 The mechanisms for this is unclear, despite few studies showing hyperglycemia-induced impaired  
299 IgG influx and complement protein release, which are needed for opsonization (36). Further,  
300 hyperglycemia likely enhanced glucose uptake to accelerate glycolytic activity, in turn increasing  
301 lactate and ATP production used for inflammatory responses. The combination of elevated  
302 glycolysis and hyperglycemia-induced impaired phagocytosis may explain poorer sepsis outcomes  
303 in these infected animals.

304           In contrast, restricted parenteral glucose caused hypoglycemia but completely prevented  
305 infected animals from elevated glycolysis, excessive inflammation and sepsis. This solution may  
306 not be practical for hospitalized infants due to the fear of hypoglycemia-induced brain injury (17).

307 Therefore, we postulated that any other ways of reducing glycolysis may be beneficial for both  
308 infection and sepsis outcomes without causing hypoglycemia. This was in principle challenging as  
309 phagocytes are also dependent on glycolysis to clear bacteria via phagocytosis (37–39). Via  
310 screening various drugs, we identified DCA, a pyruvate dehydrogenase kinase inhibitor, with short  
311 half-life that enhances OXPHOS and decreases glycolysis, thereby potentially reducing ATP  
312 production and inflammation during infection (40). It has also been used for adult cancer patients  
313 (41). We found that DCA was detrimental in hyperglycemic but moderately beneficial in  
314 normoglycemic infected animals. Specifically, on high PN glucose background, DCA induced more  
315 severe hyperglycemia, higher levels of inflammatory cytokines and reduced bacterial clearance,  
316 suggesting its overall detrimental effects likely derived from the decreased cellular glucose uptake  
317 during hyperglycemia. In contrast, reducing systemic glucose provision more moderately reduced  
318 dysglycemia, glycolysis, lactic acidosis and inflammation via restricted cellular glucose influx,  
319 while DCA use on this lower parenteral glucose background further dampened inflammation via its  
320 inhibitory effects on glycolysis and lactate production. Importantly, despite evoking temporary  
321 glycolysis inhibition, DCA treatment during normoglycemia also enhanced *in vivo* bacterial  
322 clearance, likely via the enhanced neutrophil phagocytosis, as evidenced by transcriptomic  
323 responses and phagocytosis test in DCA-treated cord blood and also previous studies (42, 43).  
324 Clearly, the interaction between parenteral glucose supply and DCA mechanistic actions determined  
325 the inflammatory outcomes, suggesting careful blood glucose monitoring during DCA use.

326 Importantly, whether with or without additional DCA treatment, standardization of PN  
327 glucose supply to that recommended in clinical neonatal guidelines (17) could not prevent infected  
328 animals from showing clinical signs of sepsis, including acidemia (decreased blood pH) and  
329 respiratory acidosis (increased pCO<sub>2</sub>) despite ameliorated inflammatory effects. Our results thus  
330 challenge the appropriateness of this international guideline, as this does not consider detailed PN  
331 glucose regimes during neonatal infection. Hence, there is a great need for clinical trials testing

332 lower PN glucose provisions in infected preterm infants. If these lower glucose interventions cannot  
333 further decrease sepsis risk, restricted parenteral glucose during neonatal infection as shown in our  
334 current study may be a solution to prevent life-threatening sepsis despite causing temporary  
335 hypoglycemia.



## 336 **Materials and Methods**

### 337 ***S. epidermidis* culture preparation**

338 *S. epidermidis* (WT-1457) was prepared from frozen stock. Bacteria were previously cultured in  
339 heart infusion broth (HIB). Bacterial concentration and optical density (OD) in the stock was pre-  
340 determined by CFU counting following bacterial stock washing in PBS (Sigma-Aldrich),  
341 resuspension and dilution in PBS at 4°C, and 20µl spotting in triplicates on a blood agar plates for  
342 overnight incubation at 37°C. Right before *in vitro* experiments, bacterial stock was thawed and  
343 diluted in PBS at 4°C to reach the desired concentrations for cord blood stimulation, based on the  
344 pre-determined concentration in the stock. For *in vivo* experiments, 30 ml tryptic soy broth was  
345 inoculated with 500 µl *S. epidermidis* stock and incubated for 17 h at 37°C and 200 rpm. Culture  
346 OD was then measured by spectrophotometry and bacterial concentration estimated based on a  
347 previously established OD-to-CFU conversion factor. The culture was centrifuged for 20 min at  
348 3000 × g and bacterial pellet suspended in sterile physiological saline at 3 × 10<sup>8</sup> CFU/ml. The *S.*  
349 *epidermidis* culture was serially diluted and plated onto tryptic soy agar and incubated overnight at  
350 37°C to verify the actual concentration for each *in vitro* and *in vivo* experiment.

### 351 ***In vitro* cord blood stimulation with *S. epidermidis***

352 Cord blood collected at preterm pig delivery (day 106 of gestation, term at day 117±2) was  
353 aliquoted into a sterile 96 well plate (200µl/well) and stimulated with an increasing dose of *S.*  
354 *epidermidis* (5×10<sup>1</sup>-5×10<sup>7</sup> cells/ml blood) at 37°C with 5% CO<sub>2</sub> for 2 h. In some experiments,  
355 blood was pre-incubated with various concentrations of glycolysis inhibitors (rapamycin, DCA and  
356 FX11, all from Sigma-Aldrich, Copenhagen, Denmark). After stimulation, 90 µl blood was  
357 stabilized with 200 µl mixture of lysis/binding solution concentrate and isopropanol (MagMax 96  
358 blood RNA isolation kit, Thermofisher, Roskilde, Denmark), and stored at -80°C for later RNA  
359 extraction. The remaining blood was centrifuged (2000×g, 10 min, 4°C), and plasma analyzed for

360 cytokines and metabolic targets. In some experiments, cord blood after stimulation was used for  
361 flow cytometry analysis of regulatory T cells (Treg). All *in vitro* experiments were performed using  
362 cord blood from at least 4 preterm animals.

### 363 ***In vivo S. epidermidis* infection in preterm pigs**

364 The animal studies and experimental procedures were approved by the Danish Animal Experiments  
365 Inspectorate (license no. 2020-15-0201-00520), which complies with the EU Directive 2010/63. All  
366 piglets (cross-bred, Landrace x Yorkshire x Duroc) were delivered by elective cesarean section at  
367 gestational day 106 corresponding to ~90% of the total length of gestation. Sow's anesthesia and  
368 surgical procedures are described in details elsewhere (44). After delivery, the animals were single-  
369 housed in ventilated, heated (37°C) incubators with oxygen supply (1 l/min). For resuscitation,  
370 animals received Doxapram and Flumazenil (0.1 ml/kg each drug, intramuscularly), and positive  
371 airway pressure ventilation until breathing stabilized. Once stabilized, a 4 Fr gauge catheter was  
372 inserted into one of the umbilical arteries under aseptic conditions and fixed at the level of the  
373 descending aorta for provision of parenteral nutrition (PN), *S. epidermidis* inoculation and blood  
374 sampling. Successfully resuscitated animals were stratified by sex and birth weight, and allocated  
375 into treatment groups using random number generation. In all animal experiments, *S. epidermidis*  
376 was administered intra-arterially as a 3 min continuous infusion (3.33 ml/kg) within 4 h after birth  
377 using a precision infusion pump. The animals were nourished parenterally with Kabiven infusion  
378 formula (Fresenius-Kabi, Bad Homburg, Germany) using different glucose concentrations at  
379 infusion rates of 6 ml/kg/h. Animals were permanently monitored by experienced caretakers for the  
380 duration of the experiments (12-24 h) and euthanized preschedule if presenting with clinical signs  
381 of septic shock (e.g. extreme lethargy, discoloration, hypo-perfusion). Blood was collected by  
382 jugular venous or heart puncture on sterilized skin for bacteriology and through the umbilical  
383 catheter for the remaining analytical endpoints. Scheduled euthanasia was preceded by induction of  
384 deep anesthesia and executed by a lethal dose of intra-cardiac barbiturate. Animal caretakers were

385 not blinded to the respective treatment groups, but all endpoint and data analyses (except meconium  
386 passage time) were conducted in a blinded fashion.

387 In the initial *in vivo* bacterial dose-response experiment that served to establish a clinical and  
388 metabolic phenotype, animals were randomly allocated to receive saline (CON, n = 13),  $10^6$  (n = 7),  
389  $10^8$  (n = 14),  $10^9$  (n = 10), or  $5 \times 10^9$  (n = 13) CFU/kg *S. epidermidis*. Animals were nourished with  
390 PN containing a standard glucose concentration (10%), corresponding to a daily glucose intake of  
391 14.4 g/kg, and monitored for 24 h including blood collection at 12 and 24 h.

392 In the subsequent experiment addressing the hypothesis that glucose restriction protected  
393 against sepsis, animals were randomly allocated to receive  $10^9$  CFU/kg *S. epidermidis* and PN  
394 formula containing either a low glucose (LG, 1.4% or 2 g/kg/d, n = 10) or high glucose (HG, 21%  
395 or 30 g/kg/d, n = 11) concentration. A third group of reduced sample size served as uninfected  
396 controls (CON, n = 3) and received low glucose (1.4%) parenteral formulation. All animals were  
397 monitored for 12 h including blood collection at 3, 6, and 12 h.

398 The final experiment addressed the hypothesis that reducing PN glucose intake from high to  
399 standard regimes with or without indirect glycolysis inhibition via DCA administration (directly  
400 inhibiting pyruvate dehydrogenase kinase 1, PDK1) would protect against sepsis. Animals were  
401 randomly allocated to receive  $10^9$  CFU/kg *S. epidermidis* and PN containing standard glucose  
402 concentration (STD, 10%, 14.4 g/kg/d, n = 15) without or with DCA (STD-DCA, n = 15), or PN  
403 with high glucose concentration (HG, 21%, n = 9) without or with DCA (HG-DCA, n = 9). DCA  
404 groups received 50 mg/kg (1 ml solution per kg) DCA intra-arterially exactly 30 min after *S.*  
405 *epidermidis* infusion, whereas DCA controls received an equivalent volume of sterile physiological  
406 saline. Some infected STD-DCA animals (n = 7) also received additional DCA (50 mg/kg) at 3 and  
407 6 h post-infection but showed no additional effects relative to those with single DCA treatment, and  
408 were therefore pooled to form the STD-DCA group. Besides, animals were randomly allocated to

409 two uninfected control groups receiving either standard (CON-STD, n = 7) or high PN glucose  
410 (CON-HG, n = 4). The animals were monitored for 12 h including blood sampling at 3, 6, and 12 h.

#### 411 **Treg and neutrophil phagocytosis**

412 In an *in vitro* experiment, the frequency of Treg cells in stimulated blood was analyzed as  
413 previously described(28). In brief, blood after bacterial stimulation was lysed to remove  
414 erythrocytes, washed with PBS, permeabilized (permabilization buffer, Thermofisher), blocked  
415 with porcine serum (Thermofisher Scientific), and stained with a mixture of FITC-conjugated  
416 mouse-IgG2b anti-porcine CD4 antibody (clone MIL17), APC-conjugated rat-IgG2a anti-porcine  
417 Foxp3 antibody (clone FJK-16s), and analyzed by a BD Accuri C6 flow cytometer (BD  
418 Biosciences, USA). Treg was defined as CD4<sup>+</sup>Foxp3<sup>+</sup> lymphocytes. In another experiment, cord  
419 blood pre-incubated with a glycolysis inhibitor DCA under different glycemic conditions was  
420 assessed for its phagocytosis capacity as previously described(45). In brief, 100 µl cord blood was  
421 stimulated with pHrodo red-conjugated *E.coli* bioparticles (Phagocytosis kit, Thermofisher) at 37°C  
422 for 30 min, followed by flow cytometry analysis as mentioned above. Percentage of neutrophils  
423 having phagocytic capacity in total number of neutrophils was evaluated.

#### 424 **Gene expression analysis by qPCR**

425 Total whole blood RNA from *in vitro* and *in vivo* experiments was extracted using MagMAX 96  
426 Blood RNA Isolation Kit (Thermofisher). RNA was then converted to cDNA with the High  
427 capacity cDNA reverse transcription kit (Applied Biosystems, USA). Transcription of selected  
428 genes related to inflammation, innate and adaptive immunity and energy metabolisms were  
429 determined by quantitative polymerase chain reaction (qPCR) using QuantiTect SYBR Green PCR  
430 Kit (Qiagen, Netherlands) on the LightCycler 480 system (Roche, Switzerland) with predesigned  
431 primers (sequences in Table S18). Primers were designed with Genes database and Primer-BLAST  
432 software (National Center for Biotechnology Information, USA). Relative expression of target  
433 genes was calculated by double delta Ct method with HPRT1 served as the housekeeping gene.

#### 434 **Whole transcriptome shotgun sequencing**

435 Whole blood RNA of selected samples from *in vitro* and *in vivo* experiments was analyzed by  
436 whole transcriptome shotgun sequencing, as previously described(28), to profile immunometabolic  
437 pathways affected by relevant interventions. Briefly, RNA-seq libraries were constructed using  
438 1000 ng RNA and VAHTS mRNA-seq V3 Library Prep Kit for Illumina (Vazyme, China). The  
439 libraries were sequenced on the Illumina Hiseq X Ten platform (Illumina, USA) to generate 150 bp  
440 paired-end reads. Quality and adapter trimming of raw reads were performed using TrimGalore  
441 (Babraham Bioinformatics, UK). The remaining clean reads (~ 26 M per sample) were aligned to  
442 the porcine genome (Sscrofa11.1) using Tophat2(46). The annotated gene information of porcine  
443 genome was obtained from Ensembl (release 99). The script htseq-count(47) was used to generate  
444 gene count matrix, followed by analyses of differentially expressed genes (DEGs) using  
445 DESeq2(48).

#### 446 **Plasma cytokines and metabolic targets**

447 Plasma from *in vitro* and *in vivo* experiments were analyzed for porcine specific cytokines using  
448 enzyme-linked immunosorbent assay (ELISA, TNF $\alpha$  (DY690B), IL10 (DY693B) and IL6 (DY686,  
449 porcine DuoSet, R&D systems, Abingdon, UK), and targets related to energy metabolism. Glucose  
450 and lactate were measured by Lactate Assay Kit and Glucose Assay Kit, respectively (all from  
451 Nordic BioSite, Denmark). Extracellular ATP and pyruvate levels were measured by the ATP  
452 Colorimetric/Fluorometric Assay Kit and the Pyruvate Assay Kit (SigmaAldrich).

#### 453 **Statistics**

454 All continuous data were analysed using in R studio 3.4.1 (R Studio, Boston, MA). *In vitro* data  
455 were analysed by a linear mixed-effect model with treatment as a fixed factor and pig ID as a  
456 random factor, followed by Tukey Post-hoc pair-wise comparisons. Survival curves (meconium  
457 passages or survival) were analyzed using Matel-Cox log-rank tests. To compare HG vs. LG  
458 infected animals, each parameter was fitted in to a linear mixed-effect model with glucose level,

459 time and their interaction as fixed factors and litter and pig ID as random factors, using lme4 and  
460 multcomp packages(49). Group comparisons at each time point were also performed with similar  
461 models without contributing factors of time of blood sampling and pig ID. For the experiment  
462 identifying glucose and DCA effects in infected animals, each parameter at each blood sampling  
463 time point was fitted into a linear mixed-effect model with glucose, DCA, and their interaction as  
464 fixed factors and pig ID as a random factor. For pair-wise comparisons, Tukey Post-hoc test was  
465 used after a linear mixed effect model was applied with treatment as a fixed factor and litter as  
466 random factor. An adjusted P-value  $< 0.05$  was regarded as statistically significant. Data are  
467 presented as violin dot plots with median and interquartile range. All reported measures were  
468 evaluated for normal distribution, and logarithmic transformation was performed if necessary. For  
469 transcriptomics, significant DEGs among groups were identified by DESeq2 using Benjamini-  
470 Hochberg (BH)-adjusted P-value  $< 0.1$  as cut-off. To control type I error, p values tests were further  
471 adjusted by false discovery rate (FDR,  $\alpha = 0.1$ ) into q values(50). Gene ontology and KEGG  
472 pathway enrichment analyses were performed using DAVID (51) and a BH-adjusted P-value  $< 0.05$   
473 was considered statistically significant. Lists of genes with mean expression levels and adjusted P-  
474 values as well as enriched pathways with associated DEGs were listed for each comparison from *in*  
475 *vitro* (Table S1-8), and *in vivo* experiments (Table S9-17). Heatmaps were generated using R  
476 package pheatmap.

477

## 478 **References**

- 479 1. Strunk T et al. Infection-induced inflammation and cerebral injury in preterm infants. *Lancet*  
480 *Infect Dis* 2014;14(8):751–762.
- 481 2. Dong Y, Speer CP. Late-onset neonatal sepsis: recent developments. *Arch Dis Child Fetal*  
482 *Neonatal Ed* 2015;100(3):F257–F263.

- 483 3. Dong Y, Speer CP, Glaser K. Beyond sepsis: *Staphylococcus epidermidis* is an underestimated  
484 but significant contributor to neonatal morbidity. *Virulence* 2018;9(1):621.
- 485 4. Strunk T et al. Impaired cytokine responses to live *Staphylococcus epidermidis* in preterm infants  
486 precede Gram-positive late-onset sepsis. *Clin Infect Dis* 2020;72: 271-278.
- 487 5. Clark RH, Bloom BT, Spitzer AR, Gerstmann DR. Empiric use of ampicillin and cefotaxime,  
488 compared with ampicillin and gentamicin, for neonates at risk for sepsis is associated with an  
489 increased risk of neonatal death. *Pediatrics* 2006;117(1):67–74.
- 490 6. Stoll BJ et al. Very low birth weight preterm infants with early onset neonatal sepsis: the  
491 predominance of gram-negative infections continues in the National Institute of Child Health and  
492 Human Development Neonatal Research Network, 2002-2003. *Pediatr Infect Dis J*  
493 2005;24(7):635–639.
- 494 7. Becattini S, Taur Y, Pamer EG. Antibiotic-Induced Changes in the Intestinal Microbiota and  
495 Disease. *Trends Mol Med* 2016;22(6):458–478.
- 496 8. Harbeson D, Francis F, Bao W, Amenyogbe NA, Kollmann TR. Energy demands of early life  
497 drive a disease tolerant phenotype and dictate outcome in neonatal bacterial sepsis. *Front Immunol*  
498 2018;9: 1918
- 499 9. Conti MG et al. Immunometabolic approaches to prevent, detect, and treat neonatal sepsis. *Ped*  
500 *Res* 2020;87(2):399–405.
- 501 10. Kan B et al. Cellular metabolism constrains innate immune responses in early human ontogeny.  
502 *Nat Commun* 2018;9(1):4822.
- 503 11. Dreschers S et al. Impaired cellular energy metabolism in cord blood macrophages contributes  
504 to abortive response toward inflammatory threats. *Nat Commun* 2019;10(1):1685.
- 505 12. Levy O et al. Selective impairment of TLR-mediated innate immunity in human newborns:  
506 neonatal blood plasma reduces monocyte TNF-alpha induction by bacterial lipopeptides,

- 507 lipopolysaccharide, and imiquimod, but preserves the response to R-848. *J Immunol*  
508 2004;173(7):4627–4634.
- 509 13. Sadeghi K et al. Immaturity of infection control in preterm and term newborns is associated  
510 with impaired toll-like receptor signaling. *J Infect Dis* 2007;195(2):296–302.
- 511 14. Hibbert JE, Currie A, Strunk T. Sepsis-Induced Immunosuppression in Neonates. *Front Pediatr*  
512 2018;6:357
- 513 15. McGuire W, Henderson G, Fowlie PW. Feeding the preterm infant. *BMJ* 2004;329(7476):1227–  
514 1230.
- 515 16. Alaedein DI, Walsh MC, Chwals WJ. Total parenteral nutrition-associated hyperglycemia  
516 correlates with prolonged mechanical ventilation and hospital stay in septic infants. *J Pediatr Surg*  
517 2006;41(1):239–244.
- 518 17. Mesotten D, Joosten K, van Kempen A, Verbruggen S, ESPGHAN/ESPEN/ESPR/CSPEN  
519 working group on pediatric parenteral nutrition. ESPGHAN/ESPEN/ESPR/CSPEN guidelines on  
520 pediatric parenteral nutrition: Carbohydrates. *Clin Nutr* 2018;37(6 Pt B):2337–2343.
- 521 18. Harris DL, Weston PJ, Harding JE. Incidence of Neonatal Hypoglycemia in Babies Identified as  
522 at Risk. *J Ped* 2012;161(5):787–791.
- 523 19. Rozance PJ, Hay WW. Neonatal Hyperglycemia. *NeoReviews* 2010;11(11):e632–e639.
- 524 20. Beardsall K et al. Prevalence and determinants of hyperglycemia in very low birth weight  
525 infants: cohort analyses of the NIRTURE study. *J Ped* 2010;157(5):715-719.e3.
- 526 21. Hubbard WJ et al. Cecal ligation and puncture. *Shock* 2005;24 Suppl 1:52–57.
- 527 22. Singer JR et al. Preventing dysbiosis of the neonatal mouse intestinal microbiome protects  
528 against late-onset sepsis. *Nat Med* 2019;25(11):1772–1782.
- 529 23. Knoop KA et al. Maternal activation of the EGFR prevents translocation of gut-residing  
530 pathogenic *Escherichia coli* in a model of late-onset neonatal sepsis. *Proc Natl Acad Sci U S A*  
531 2020;117(14):7941–7949.



- 532 24. Brunse A, Worsøe P, Pors SE, Skovgaard K, Sangild PT. Oral Supplementation with Bovine  
533 Colostrum Prevents Septic Shock and Brain Barrier Disruption During Bloodstream Infection in  
534 Preterm Newborn Pigs. *Shock* 2018;51:337-347.
- 535 25. Burrin D et al. Translational Advances in Pediatric Nutrition and Gastroenterology: New  
536 Insights from Pig Models. *Annu Rev Anim Biosci* 2020;8:321–354.
- 537 26. Sangild PT et al. Diet- and colonization-dependent intestinal dysfunction predisposes to  
538 necrotizing enterocolitis in preterm pigs. *Gastroenterology* 2006;130(6):1776–1792.
- 539 27. Nguyen DN et al. Prenatal intra-amniotic endotoxin induces fetal gut and lung immune  
540 responses and postnatal systemic inflammation in preterm pigs. *Am J Pathol* 2018;188(11):2629–  
541 2643.
- 542 28. Ren S, Pan X, Gao F, Sangild PT, Nguyen DN. Prenatal inflammation suppresses blood Th1  
543 polarization and gene clusters related to cellular energy metabolism in preterm newborns. *FASEB J*  
544 2020;34(2):2896–2911.
- 545 29. James MO et al. Therapeutic applications of dichloroacetate and the role of glutathione  
546 transferase zeta-1. *Pharmacol Ther* 2017;170:166–180.
- 547 30. Ohashi T et al. Dichloroacetate improves immune dysfunction caused by tumor-secreted lactic  
548 acid and increases antitumor immunoreactivity. *Int J Cancer* 2013;133(5):1107–1118.
- 549 31. O’Neill LAJ, Kishton RJ, Rathmell J. A guide to immunometabolism for immunologists. *Nat*  
550 *Rev Immunol* 2016;16(9):553–565.
- 551 32. de Jong E et al. Identification of generic and pathogen-specific cord blood monocyte  
552 transcriptomes reveals a largely conserved response in preterm and term newborn infants. *J Mol*  
553 *Med* 2018;96(2):147–157.
- 554 33. Boomer JS et al. Immunosuppression in patients who die of sepsis and multiple organ failure.  
555 *JAMA* 2011;306(23):2594–2605.

- 556 34. Javid A et al. Hyperglycemia Impairs Neutrophil-Mediated Bacterial Clearance in Mice Infected  
557 with the Lyme Disease Pathogen. *PLOS ONE* 2016;11(6):e0158019.
- 558 35. Gan Y-H. Host Susceptibility Factors to Bacterial Infections in Type 2 Diabetes [Internet].  
559 *PLoS Pathog* 2013;9(12):e1003794.
- 560 36. Mauriello CT et al. Hyperglycemia Inhibits Complement-Mediated Immunological Control of  
561 *S. aureus* in a Rat Model of Peritonitis [Internet]. *J Diabetes Res* 2014;2014:e762051.
- 562 37. Kumar S, Dikshit M. Metabolic Insight of Neutrophils in Health and Disease [Internet]. *Front.*  
563 *Immunol.* 2019;10:2099.
- 564 38. Pence BD, Yarbro JR. Classical monocytes maintain ex vivo glycolytic metabolism and early  
565 but not later inflammatory responses in older adults. *Immun Ageing* 2019;16(1):3.
- 566 39. Diskin C, Pålsson-McDermott EM. Metabolic modulation in macrophage effector function.  
567 *Front Immunol* 2018;9:270
- 568 40. Eleftheriadis T et al. Dichloroacetate at therapeutic concentration alters glucose metabolism and  
569 induces regulatory T-cell differentiation in alloreactive human lymphocytes. *J Basic Clin Physiol*  
570 *Pharmacol* 2013;24(4):271–276.
- 571 41. Fujiwara S et al. PDK1 inhibition is a novel therapeutic target in multiple myeloma. *Br J*  
572 *Cancer* 2013;108(1):170–178.
- 573 42. Dikalov S. Crosstalk between mitochondria and NADPH oxidases. *Free Radic Biol Med*  
574 2011;51(7):1289–1301.
- 575 43. Hassoun EA, Dey S. Dichloroacetate- and trichloroacetate-induced phagocytic activation and  
576 production of oxidative stress in the hepatic tissues of mice after acute exposure. *J Biochem Mol*  
577 *Toxicol* 2008;22(1):27–34.
- 578 44. Brunse A et al. Enteral broad-spectrum antibiotics antagonize the effect of fecal microbiota  
579 transplantation in preterm pigs. *Gut Microbes* 2021;13(1):1–16.

- 580 45. Ren S et al. Gut and immune effects of bioactive milk factors in preterm pigs exposed to  
581 prenatal inflammation. *Am J Physiol Gastrointest Liver Physiol* 2019;317:G67-G77.
- 582 46. Kim D et al. TopHat2: accurate alignment of transcriptomes in the presence of insertions,  
583 deletions and gene fusions. *Genome Biology* 2013;14(4):R36.
- 584 47. Anders S, Pyl PT, Huber W. HTSeq—a Python framework to work with high-throughput  
585 sequencing data. *Bioinformatics* 2015;31(2):166–169.
- 586 48. Love MI, Huber W, Anders S. Moderated estimation of fold change and dispersion for RNA-  
587 seq data with DESeq2. *Genome Biol* 2014;15(12):550.
- 588 49. Bates D, Mächler M, Bolker B, Walker S. Fitting linear mixed-effects models using lme4.  
589 *arXiv:1406.5823 [stat]* 2014.
- 590 50. Pollard KS et al. multtest: Resampling-based multiple hypothesis testing. Bioconductor version:  
591 Release (3.12), 2021; <https://bioconductor.org/packages/multtest/>
- 592 51. Huang DW, Sherman BT, Lempicki RA. Bioinformatics enrichment tools: paths toward the  
593 comprehensive functional analysis of large gene lists. *Nucleic Acids Res* 2009;37(1):1–13.

594 **Acknowledgements**

595       The authors thank Per Sangild, Thomas Thymann, Ole Bæk, Rene L. Shen, Xiaoyu Pan,  
596 Britta Karlsson and Jane C. Povlsen for the assistance in animal experiments and omic data  
597 acquirement.

598 **Funding**

599       The study was supported from the University of Copenhagen.

600 **Author contributions**

601       DNN designed the study. TK, AB, NLH, KAS and DNN performed the animal experiments  
602 and laboratory analyses. TM, AB and DNN conducted bioinformatics, statistical analysis and data  
603 interpretation. TM and AB managed raw data and generated all figures and tables. TM, AB and  
604 DNN drafted the manuscript. All authors contributed to data interpretation, manuscript revision and  
605 approval of the final manuscript version.

606 **Figures**

**Immunometabolic responses to increasing *S. epidermidis* doses *in vitro***

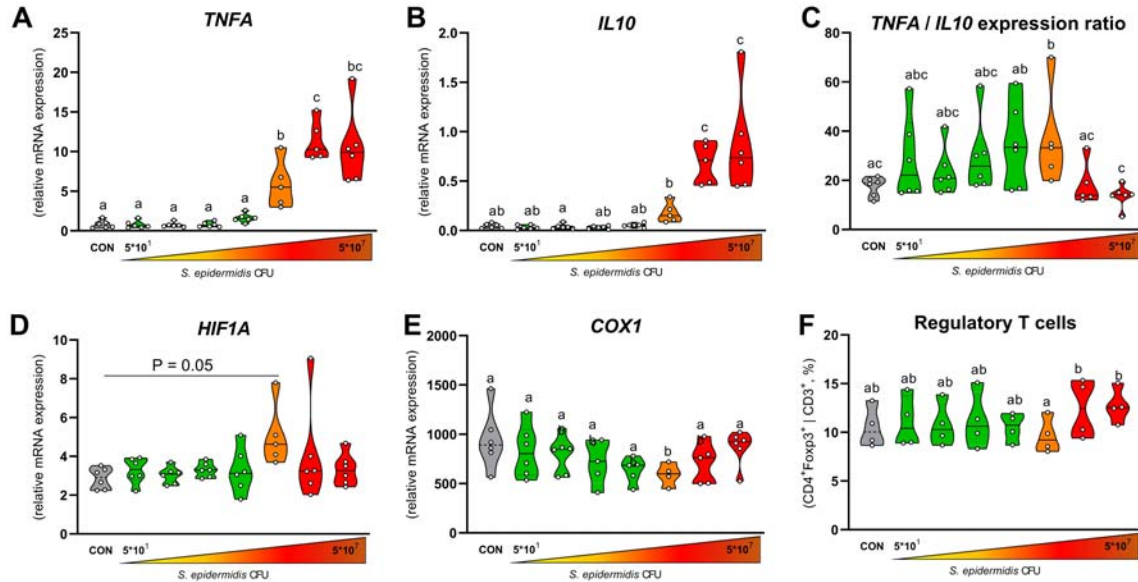

**Metabolic *S. epidermidis* dose-response *in vivo***

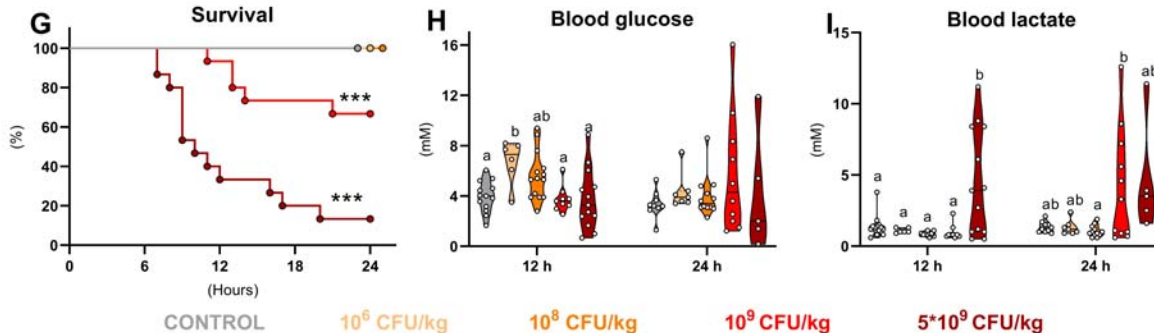

607

608

**Figure 1. *In vitro* and *in vivo* immunometabolic response to *S. epidermidis*.** (A-E) mRNA levels

609 of *TNFA*, *IL10*, *TNFA/IL10* ratio, *COX1* and *HIF1A* of cord blood from preterm piglets in responses

610 to an increasing bacterial dose ( $5 \times 10^1$ – $5 \times 10^7$  CFU/mL, stimulated for 2 h at 37°C and 5%CO<sub>2</sub>, n =

611 5-6). (F) Frequency of Foxp3<sup>+</sup> cells within the CD4<sup>+</sup> lymphocyte population in *S. epidermidis*-

612 stimulated cord blood (2 h at 37°C and 5%CO<sub>2</sub>, n = 4). (G) Survival rate, (H) blood glucose and (I)

613 lactate levels of preterm newborn piglets 24 h post-infection with *S. epidermidis* ( $10^6$ – $5 \times 10^9$

614 CFU/kg) via the intra-arterial catheter. Data in A-F, H-I are presented as violin dot plots with

615 median (solid line) and interquartile range (dotted lines) and were analyzed using linear mixed-  
616 effect model followed by Tukey Post-hoc comparisons. *In vivo* data are presented as cumulative  
617 hazard curve or violin plots and were analyzed by Mantel-Cox test or linear model followed by  
618 Tukey Post-hoc comparisons. Values at a time point not sharing the same letters are significantly  
619 different ( $P < 0.05$ ). \*\*\*  $P < 0.001$ , compared with the uninfected control.  
620

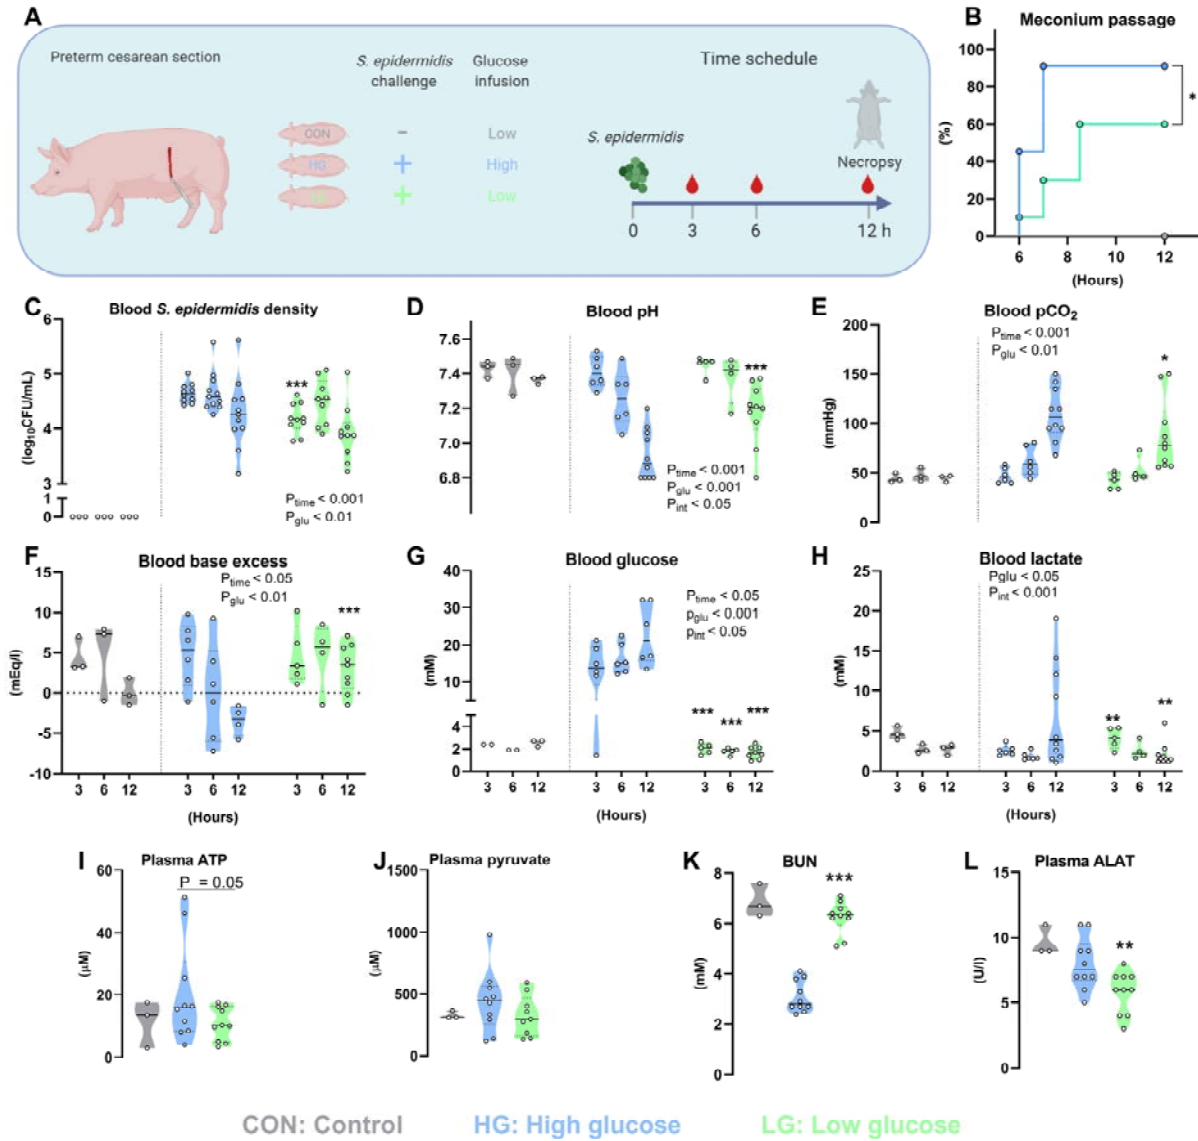

621

622 **Figure 2. Parenteral glucose restriction protects *S. epidermidis*-infected preterm piglets from**

623 **sepsis. (A)** Preterm newborn piglets were nourished exclusively with PN containing high (21%, 30

624 g/kg/day, HG) or low (1.4%, 2 g/kg/day, LG) glucose concentrations (n = 10-11 per group,) intra-

625 arterially infected with 10<sup>9</sup> CFU/kg *S. epidermidis*, and cared for 12 h post-infection or until clinical

626 signs of sepsis. Uninfected animals (n = 3) receiving low glucose PN served as a reference and were

627 not included in the statistics. **(B)** Time of first passaged meconium after infection. **(C)** *S.*

628 *epidermidis* density from blood collected by jugular venous (3-6 h) or heart puncture (12 h), by

629 counting colony-forming units after plating onto tryptic soy agar containing 5% sheep's blood and

630 incubated for 24 h at 37°C. **(D-H)** Blood gas parameters derived from arterial blood samples  
631 collected via the umbilical arterial catheter at 3, 6, and 12 h. **(I-L)**. Blood biochemical parameters  
632 measured in heparinized plasma from arterial blood collected at 12 h. Data are presented as  
633 cumulative hazard curve (B) or violin dot plots including median (solid line) and interquartile range  
634 (dotted lines) (C-L). Data are analyzed using a Mantel-Cox test (B) or a linear mixed-effects model  
635 (C-L) including an interaction between group and time post-infection (C-H). All analyzed data  
636 represents two independent litters.  $P_{\text{time}}$ ,  $P_{\text{glu}}$ , and  $P_{\text{int}}$  denote probability values for effects over time,  
637 group effect (HG vs. LG) and interaction effect between time and group in the linear mixed-effects  
638 interaction model, respectively. \*, \*\*, \*\*\*  $P < 0.05$ , 0.01, and 0.001, respectively, compared with  
639 HG group at the same time point.

640



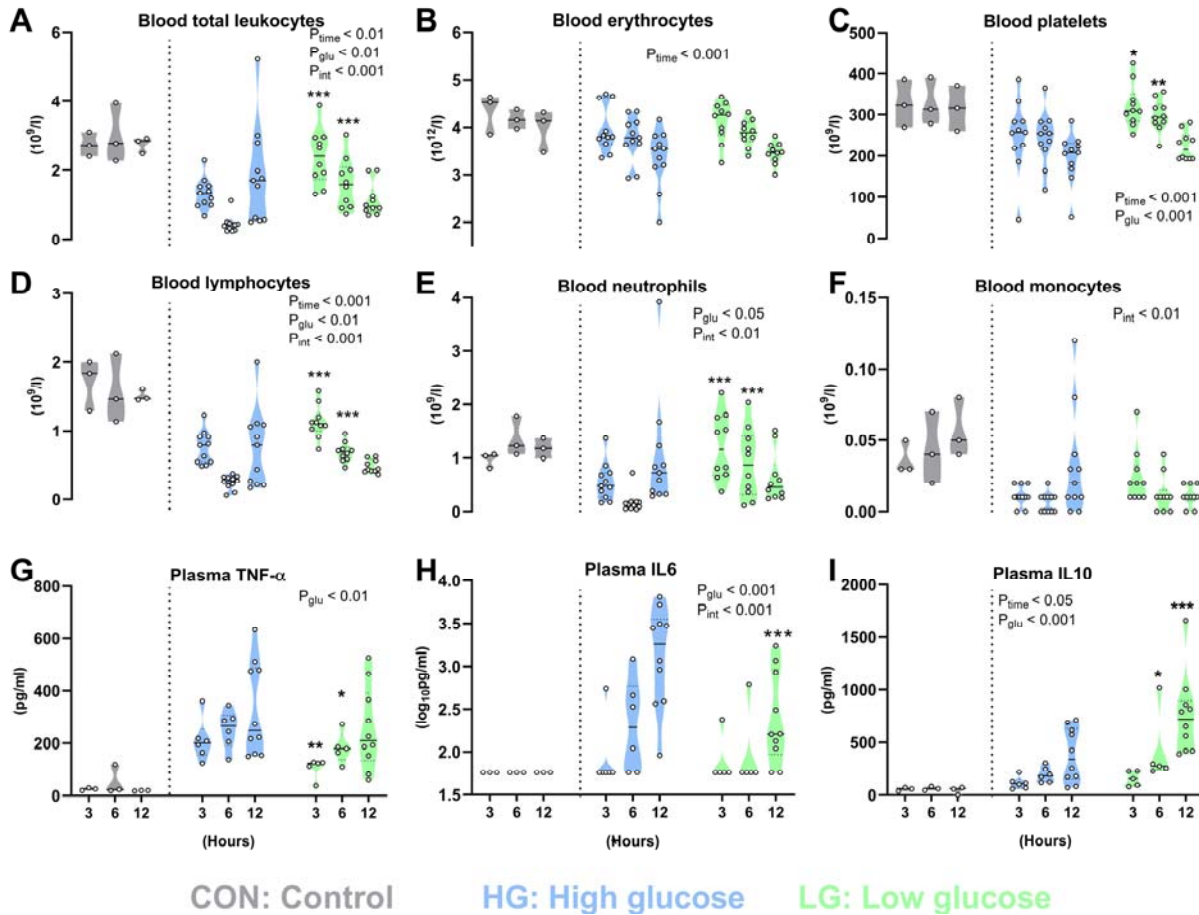

642 **Figure 3. Parenteral glucose restriction protects *S. epidermidis*-infected preterm piglets from**  
643 **excessive inflammation and immune cell loss. (A-F)** Numbers of hematopoietic cells and major  
644 leukocyte subsets in blood samples collected 3-12 h after *S. epidermidis* infusion. **(G-I)**. Cytokine  
645 levels measured in heparinized plasma from the same blood samples. Data are presented as violin  
646 dot plots with median and interquartile range and are analyzed using a linear mixed-effects model  
647 including interaction between group and time after infection. All analyzed data represents two  
648 independent experiments using separate litters.  $P_{time}$ ,  $P_{glu}$ , and  $P_{int}$  denote probability values for  
649 effects over time, group effect (HG vs. LG) and interaction effect between time and group in the  
650 linear mixed-effects model, respectively. \*, \*\*, \*\*\*  $P < 0.05$ , 0.01, and 0.001, respectively,  
651 compared with HG group at the same time point.

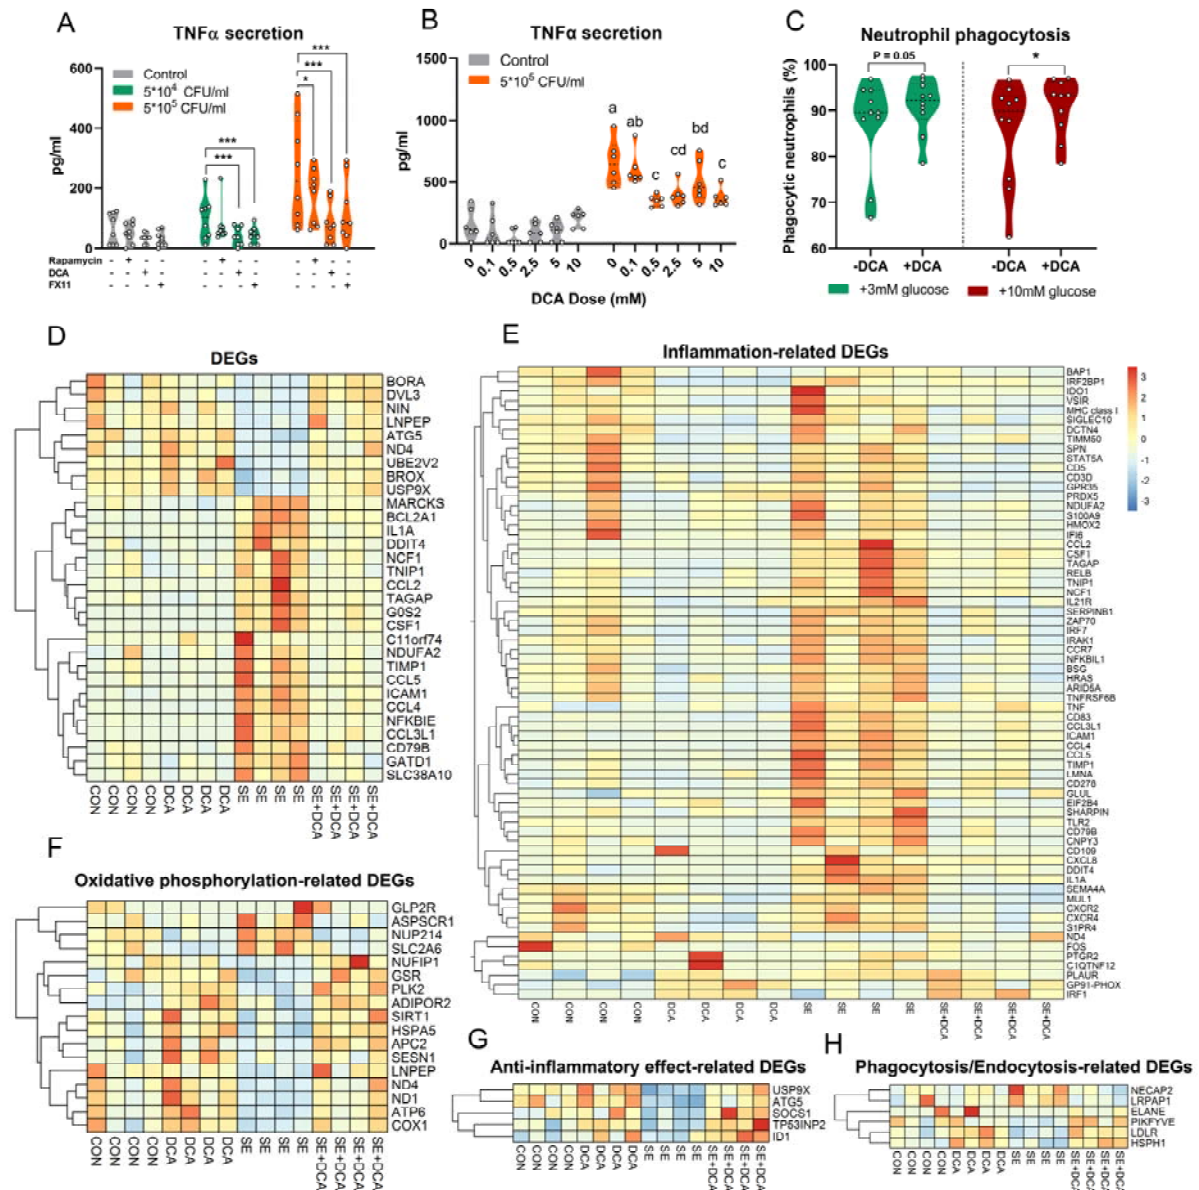

652

653 **Figure 4. Glycolysis inhibition decreases inflammation in *S. epidermidis*-challenged preterm**

654 **cord blood. (A-B)** TNF $\alpha$  levels in cord blood of preterm piglets (n = 6) following stimulation with

655 *S. epidermidis* (5 $\times$ 10<sup>4</sup> -5 $\times$ 10<sup>5</sup> CFU/ml in (A) and the later dose in (B)) with and without presence of

656 glycolysis inhibitor (rapamycin- 500 nM, DCA-10 mM in (A) and 0.1-10 mM in (B) , FX11-100

657  $\mu$ M) at 37°C and 5%CO<sub>2</sub>. incubation (n = 6). (C) Cord blood neutrophil phagocytic capacity (n =

658 10, from two independent litters) following addition of 10mM DCA or equal volume of sterile

659 water at normo- or hyper-glycemic conditions (added 3 or 10 mM glucose, respectively). *In vitro*  
660 phagocytosis assay was performed by incubation samples with pHrodo-conjugated *E.coli* for 30  
661 min at 37°C and 5%CO<sub>2</sub> and analyzed by flow cytometry. **(D-H)** Heatmaps from transcriptomic  
662 analyses of cord blood samples with/without *S. epidermidis* (5×10<sup>5</sup> CFU/ml) and DCA incubation  
663 (n = 4, from (A) experiment). (D) Top 30 DEGs from the comparison between control vs. *S.*  
664 *epidermidis*- challenged samples. Selective (E) inflammation-, (F) oxidative phosphorylation-, (G)  
665 anti-inflammatory effect-, (H) phagocytosis and endocytosis-related DEGs, obtained from the  
666 comparison between *S. epidermidis*-stimulated samples without vs. with DCA addition. Normalized  
667 expression levels of DEGs were depicted in colors from blue (low) to red (high). Data in (A-C) are  
668 presented as violin dot plots with median and interquartile range and analyzed using linear mixed-  
669 effect model with inhibitor treatment as a fixed factor and pig ID as the random factor.  
670 Transcriptomic data were analyzed by DESeq2 package in R using Benjamini-Hochberg (BH)-  
671 adjusted P-value <0.1 as cut-off and further false discovery rate adjustment (FDR,  $\alpha = 0.1$ ) to  
672 convert into q values. \*, \*\*, \*\*\* P < 0.05, 0.01, and 0.001, respectively, compared with  
673 corresponding controls without inhibitor. DCA, dichloroacetate; DEGs: differentially expressed  
674 genes; SE, *S. epidermidis*.

675

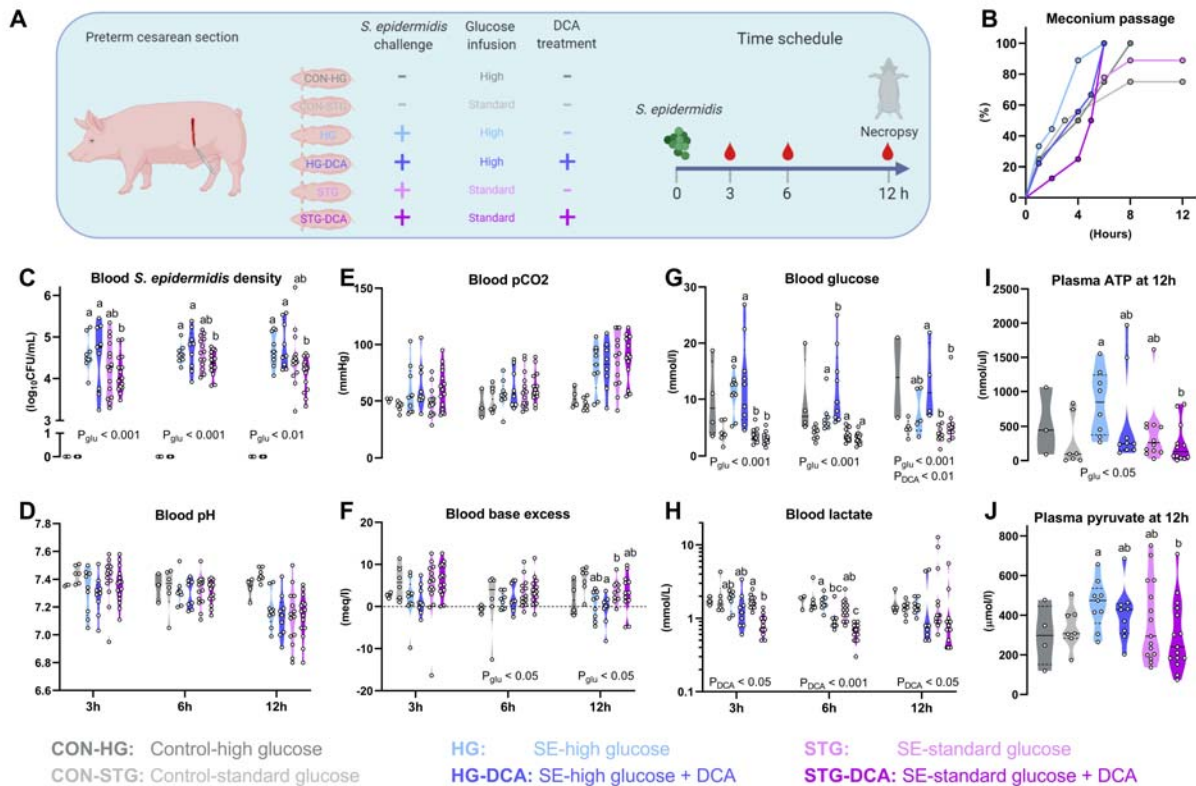

676

677 **Figure 5. The impact of parenteral glucose levels and glycolysis inhibition by DCA on clinical**  
 678 **response to *S. epidermidis* infection.** (A) Preterm newborn piglets were nourished exclusively with  
 679 PN containing high (21%, 30 g/kg/day) or standard (10%, 14.4 g/kg/day) glucose concentrations,  
 680 intra-arterially infected with 10<sup>9</sup> CFU/kg *S. epidermidis*, followed by saline or DCA treatment (50  
 681 mg/kg) 30 min post-infection (n = 9-15/group). Uninfected animals receiving either high or  
 682 standard PN glucose (n = 4 and 7, respectively) served as reference and were not included in the  
 683 statistical analysis. (B) Time of first passed meconium after *S. epidermidis* infection. (C) *S.*  
 684 *epidermidis* density from blood collected by jugular venous (3-6 h) or heart puncture (12 h), by  
 685 counting colony-forming units after plating onto tryptic soy agar containing 5% sheep's blood and  
 686 incubated for 24 h at 37°C. (D-H) Blood gas parameters in arterial blood at 3-12 h. (I-J). Plasma  
 687 ATP and pyruvate levels in heparinized plasma from arterial blood at 12 h. Data are presented as  
 688 cumulative hazard curve and analyzed by Mantel-Cox test (B) or violin dot plots including median

689 and interquartile range and analyzed separately at each blood sampling time point by linear mixed-  
690 effect model, including interaction between glucose and DCA (C-J). All analyzed data represent  
691 three independent litters. Among infected groups,  $P_{DCA}$  and  $P_{glu}$  at each time point denote  
692 probability values for overall effects of DCA and glucose among the four infected groups in the  
693 linear mixed-effect model. Values at each blood sampling time point not sharing the same letters are  
694 significantly different ( $P < 0.05$ ).

695

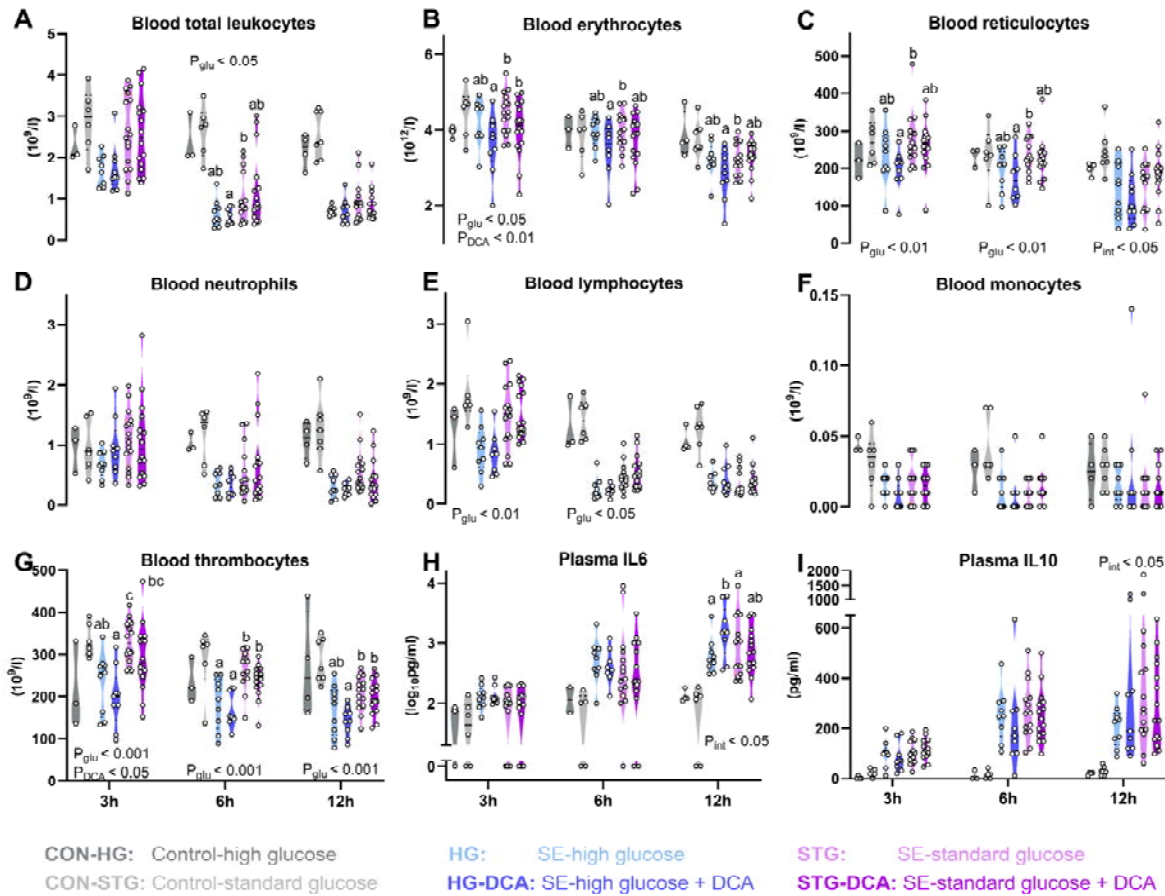

696

697 **Figure 6. The impact of parenteral glucose levels and glycolysis inhibition by DCA on cellular**

698 **and cytokine responses to *S. epidermidis* infection. (A-G).** Numbers of hematopoietic cells and

699 major leukocyte subsets in blood 3, 6, and 12 h after *S. epidermidis* infusion. **(H-I).** Plasma

700 cytokine levels from the same blood samples. Data are presented as violin dot plots with median

701 and interquartile range and are analyzed separately for each blood sampling time point using a

702 linear mixed-effect model including glucose and DCA interaction. All analyzed data represents

703 three independent experiments using separate litters. Among infected groups,  $P_{DCA}$ ,  $P_{glu}$  and  $P_{int}$  at

704 each time point denote probability values for overall effects of DCA, glucose and their interaction,

705 respectively, among the four infected groups in the linear mixed-effect model. Values at each blood

706 sampling time point not sharing the same letters are significantly different ( $P < 0.05$ ).

707

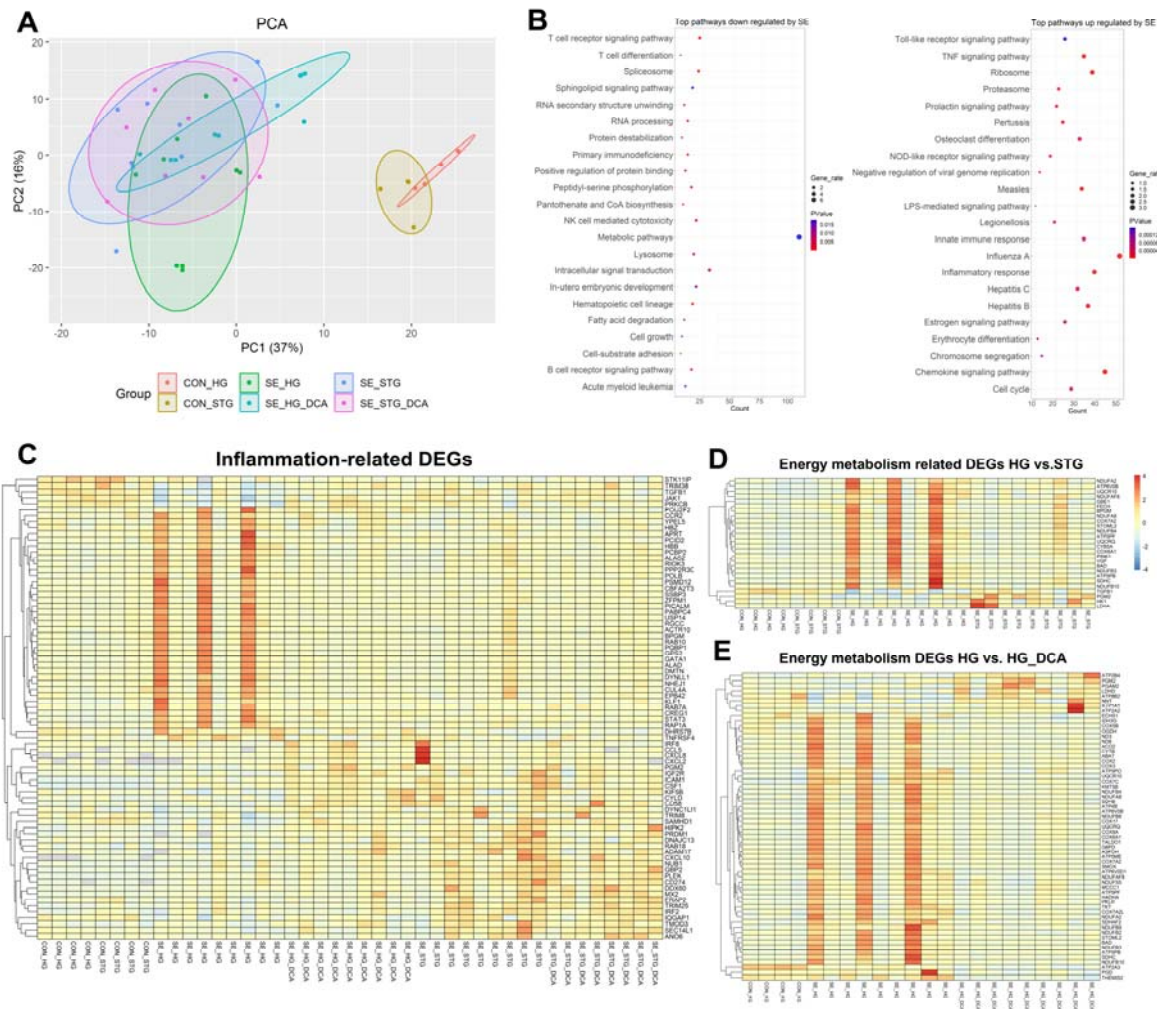

708

709 **Figure 7. Blood transcriptomic responses to *S. epidermidis* infection and the effects of**

710 **parenteral glucose levels and glycolysis inhibition by DCA. (A)** Principal component analysis of

711 the blood transcriptome at 12h in control or infected pigs nourished with high or standard parenteral

712 glucose regime, with/without DCA treatment. **(B)** Top pathways regulated by *S. epidermidis*

713 infection analyzed by KEGG and GO pathway enrichment analysis using DAVID database, and

714 DEG counts displayed in X axis. **(C-D)** Heatmaps including inflammation and energy metabolism-

715 related DEGs between HG vs. STG animals. **(E)**. Heatmap including energy metabolism-related

716 DEGs between HG vs. HG-DCA animals. Analyses included 4 animals per control group and 8-9

717 per each infected group in two independent litters. Normalized expression levels of DEGs were

718 depicted in colors from blue (low) to red (high). All the statistics was performed by DESeq2 with  
719 FDR adjusted by Benjamini-Hochberg (BH) procedure using  $\alpha = 0.1$  as the threshold.
